# Supplementary material for: Systematic Dissection of Coding Exons at Single Nucleotide Resolution Supports an Additional Role in Cell-Specific Transcriptional Regulation
Source: PubMed Central journal article supplement (PMC4207465; doi:10.1371/journal.pgen.1004592), 2014-10-23
Supplement: pgen.1004592.s005.pdf [file pgen.1004592.s005.pdf]

**Table S1.** Analysis of ChIP-seq enhancer-associated datasets for exon overlap.

**Human hepatocytes**

| Antibody                          | Total ChIP-seq peaks |                    | ChIP-seq peaks overlapping all exons |              |                    | ChIP-seq peaks overlapping coding exons |              |                    | ChIP-seq peaks overlapping coding exons, excluding the 1 <sup>st</sup> exon |              |                    |
|-----------------------------------|----------------------|--------------------|--------------------------------------|--------------|--------------------|-----------------------------------------|--------------|--------------------|-----------------------------------------------------------------------------|--------------|--------------------|
|                                   | Peaks                | Average peak width | eExon peaks                          | % from total | Average peak width | eExon peaks                             | % from total | Average peak width | eExon peaks                                                                 | % from total | Average peak width |
| H3K4me1                           | 49,185               | 5,001              | 16,874                               | 34%          | 6,576              | 14,738                                  | 30%          | 6,751              | 8,836                                                                       | 18%          | 5,991              |
| H3K27ac                           | 39,776               | 5,503              | 19,002                               | 48%          | 6,749              | 16,240                                  | 41%          | 6,981              | 8,098                                                                       | 20%          | 6,073              |
| p300                              | 10,253               | 377                | 2,479                                | 24%          | 389                | 1,333                                   | 13%          | 404                | 704                                                                         | 7%           | 398                |
| Overlapping peaks for all 3 marks | 7391                 | 390                | 1122                                 | 14%          | 406                | 484                                     | 7%           | 417                | 260                                                                         | 4%           | 417                |

**Adult mouse liver 8 weeks**

| Antibody                          | Total ChIP-seq peaks |                    | ChIP-seq peaks overlapping all exons |              |                    | ChIP-seq peaks overlapping coding exons |              |                    | ChIP-seq peaks overlapping coding exons, excluding the 1 <sup>st</sup> exon |              |                    |
|-----------------------------------|----------------------|--------------------|--------------------------------------|--------------|--------------------|-----------------------------------------|--------------|--------------------|-----------------------------------------------------------------------------|--------------|--------------------|
|                                   | Peaks                | Average peak width | eExon peaks                          | % from total | Average peak width | eExon peaks                             | % from total | Average peak width | eExon peaks                                                                 | % from total | Average peak width |
| H3K4me1                           | 37,244               | 1,518              | 7,443                                | 20%          | 1,886              | 5,946                                   | 16%          | 1,943              | 4,270                                                                       | 11%          | 1,908              |
| H3K27ac                           | 28,367               | 2,183              | 12,374                               | 44%          | 2,598              | 9,241                                   | 33%          | 2,699              | 2,451                                                                       | 9%           | 2,635              |
| p300                              | 3,871                | 480                | 1,278                                | 33%          | 587                | 719                                     | 19%          | 608                | 225                                                                         | 6%           | 553                |
| Overlapping peaks for all 3 marks | 1,519                | 529                | 347                                  | 23%          | 679                | 218                                     | 14%          | 700                | 96                                                                          | 6%           | 603                |
