# Supplementary material for: Systematic Dissection of Coding Exons at Single Nucleotide Resolution Supports an Additional Role in Cell-Specific Transcriptional Regulation
Source: PubMed Central journal article supplement (PMC4207465; doi:10.1371/journal.pgen.1004592), 2014-10-23
Supplement: pgen.1004592.s008.pdf [file pgen.1004592.s008.pdf]

**Table S4.** Mutation effect size summary.

| Liver (FC $\geq$ 1.2) | Tested sequence (bp) | exon (bp) | eExon (exon+intron) positions with FC $\geq$ 1.2 effect size (P $\leq$ 0.05) |                        |                                        |     |                                       |    | eExon (exon only) positions with effect size of FC $\geq$ 1.2 (P $\leq$ 0.05) |      |            |     |                |     |            |    |          |     |
|-----------------------|----------------------|-----------|------------------------------------------------------------------------------|------------------------|----------------------------------------|-----|---------------------------------------|----|-------------------------------------------------------------------------------|------|------------|-----|----------------|-----|------------|----|----------|-----|
|                       |                      |           | # of positions                                                               | % from total positions | Decreasing enhancer activity positions |     | Increasing enhancer activity position |    | overlap exon                                                                  |      | synonymous |     | non-synonymous |     | stop codon |    | intronic |     |
|                       |                      |           |                                                                              |                        |                                        |     |                                       |    |                                                                               |      |            |     |                |     |            |    |          |     |
| SORL1                 | 555                  | 174       | 67                                                                           | 12%                    | 39                                     | 7%  | 28                                    | 5% | 31                                                                            | 46%  | 9          | 29% | 21             | 68% | 1          | 3% | 36       | 54% |
| PPARG                 | 538                  | 268       | 163                                                                          | 30%                    | 118                                    | 22% | 45                                    | 8% | 91                                                                            | 56%  | 18         | 20% | 65             | 71% | 8          | 9% | 72       | 44% |
| TRAF3IP2              | 654                  | 636       | 80                                                                           | 12%                    | 50                                     | 8%  | 30                                    | 5% | 80                                                                            | 100% | 17         | 21% | 59             | 74% | 4          | 5% | 0        | 0%  |
| Average               |                      |           |                                                                              | 18%                    |                                        | 12% |                                       | 6% |                                                                               | 67%  |            | 23% |                | 71% |            | 6% |          |     |

| Liver (FC $\geq$ 2) | Tested sequence (bp) | exon (bp) | eExon sequence (exon+intron) positions with effect size of FC $\geq$ 2 (P $\leq$ 0.05) |                        |                              |    | exon sequence positions with effect size of FC $\geq$ 2 (P $\leq$ 0.05) |    |              |      |            |     |                |     |            |     |          |     |
|---------------------|----------------------|-----------|----------------------------------------------------------------------------------------|------------------------|------------------------------|----|-------------------------------------------------------------------------|----|--------------|------|------------|-----|----------------|-----|------------|-----|----------|-----|
|                     |                      |           | # of positions                                                                         | % from total positions | Decreasing enhancer activity |    | Increasing enhancer activity position                                   |    | overlap exon |      | synonymous |     | non-synonymous |     | stop codon |     | intronic |     |
|                     |                      |           |                                                                                        |                        |                              |    |                                                                         |    |              |      |            |     |                |     |            |     |          |     |
| SORL1               | 555                  | 174       | 27                                                                                     | 5%                     | 24                           | 4% | 3                                                                       | 1% | 15           | 56%  | 4          | 27% | 11             | 73% | 0          | 0%  | 12       | 44% |
| PPARG               | 538                  | 268       | 14                                                                                     | 3%                     | 13                           | 2% | 1                                                                       | 0% | 10           | 71%  | 2          | 20% | 7              | 70% | 1          | 10% | 4        | 29% |
| TRAF3IP2            | 654                  | 636       | 24                                                                                     | 4%                     | 23                           | 4% | 1                                                                       | 0% | 24           | 100% | 3          | 13% | 19             | 79% | 2          | 8%  | 0        | 0%  |
| Average             |                      |           |                                                                                        | 4%                     |                              | 3% |                                                                         | 0% |              |      |            |     |                |     |            |     |          |     |

| HeLa (FC $\geq$ 1.2) | Tested sequence (bp) | exon (bp) | eExon sequence (exon+intron) positions with effect size of FC $\geq$ 1.2 (P $\leq$ 0.05) |                        |                                        |      |                                       |    | exon sequence positions with effect size of FC $\geq$ 1.2 (P $\leq$ 0.05) |      |            |     |                |     |            |    |          |     |
|----------------------|----------------------|-----------|------------------------------------------------------------------------------------------|------------------------|----------------------------------------|------|---------------------------------------|----|---------------------------------------------------------------------------|------|------------|-----|----------------|-----|------------|----|----------|-----|
|                      |                      |           | # of positions                                                                           | % from total positions | Decreasing enhancer activity positions |      | Increasing enhancer activity position |    | overlap exon                                                              |      | synonymous |     | non-synonymous |     | stop codon |    | intronic |     |
|                      |                      |           |                                                                                          |                        |                                        |      |                                       |    |                                                                           |      |            |     |                |     |            |    |          |     |
| SORL1                | 555                  | 174       | 31                                                                                       | 6%                     | 21                                     | 4%   | 10                                    | 2% | 11                                                                        | 35%  | 3          | 27% | 8              | 73% | 0          | 0% | 20       | 65% |
| PPARG                | 538                  | 268       | 95                                                                                       | 18%                    | 74                                     | 14%  | 21                                    | 4% | 50                                                                        | 53%  | 11         | 22% | 39             | 78% | 4          | 8% | 45       | 47% |
| TRAF3IP2             | 654                  | 636       | 3                                                                                        | 0.5%                   | 3                                      | 0.5% | 0                                     | 0% | 3                                                                         | 100% | 1          | 33% | 2              | 67% | 0          | 0% | 0        | 0%  |
| Average              |                      |           |                                                                                          | 8%                     |                                        | 6%   |                                       | 2% |                                                                           | 63%  |            | 28% |                | 72% |            | 3% |          |     |

| HeLa (FC $\geq$ 2) | Tested sequence (bp) | exon (bp) | eExon sequence (exon+intron) positions with effect size of FC $\geq$ 2 (P $\leq$ 0.05) |                        |                              |    | exon sequence positions with effect size of FC $\geq$ 2 (P $\leq$ 0.05) |    |              |     |            |    |                |      |            |    |          |     |
|--------------------|----------------------|-----------|----------------------------------------------------------------------------------------|------------------------|------------------------------|----|-------------------------------------------------------------------------|----|--------------|-----|------------|----|----------------|------|------------|----|----------|-----|
|                    |                      |           | # of positions                                                                         | % from total positions | Decreasing enhancer activity |    | Increasing enhancer activity position                                   |    | overlap exon |     | synonymous |    | non-synonymous |      | stop codon |    | intronic |     |
|                    |                      |           |                                                                                        |                        |                              |    |                                                                         |    |              |     |            |    |                |      |            |    |          |     |
| SORL1              | 555                  | 174       | 1                                                                                      | 0%                     | 0                            | 0% | 1                                                                       | 0% | 0            | 0%  | 0          | 0% | 0              | 0%   | 0          | 0% | 0        | 0%  |
| PPARG              | 538                  | 268       | 4                                                                                      | 3%                     | 4                            | 1% | 0                                                                       | 0% | 3            | 75% | 0          | 0% | 3              | 100% | 0          | 0% | 1        | 25% |
| TRAF3IP2           | 654                  | 636       | 0                                                                                      | 0%                     | 0                            | 0% | 0                                                                       | 0% | 0            | 0%  | 0          | 0% | 0              | 0%   | 0          | 0% | 0        | 0%  |
| Average            |                      |           |                                                                                        | 1%                     |                              | 0% |                                                                         | 0% |              | 25% |            | 0% |                | 33%  |            | 0% |          |     |
