# Supplementary material for: Systematic Dissection of Coding Exons at Single Nucleotide Resolution Supports an Additional Role in Cell-Specific Transcriptional Regulation
Source: PubMed Central journal article supplement (PMC4207465; doi:10.1371/journal.pgen.1004592), 2014-10-23
Supplement: pgen.1004592.s010.pdf [file pgen.1004592.s010.pdf]

**Table S6.** ChIP-seq peaks overlapping synonymous constraint elements (SCEs).

**Human hepatocytes**

| Antibody                          | Total ChIP-seq peaks that overlap coding exons (hg19) |                         | Total ChIP-seq peaks that overlap coding exons after LiftOver to hg18 |                         | Coding exon ChIP-seq peaks overlapping SCE9 windows |              | Coding exon ChIP-seq peaks overlapping SCE15 windows |              | Coding exon ChIP-seq peaks overlapping SCE30 windows |              |
|-----------------------------------|-------------------------------------------------------|-------------------------|-----------------------------------------------------------------------|-------------------------|-----------------------------------------------------|--------------|------------------------------------------------------|--------------|------------------------------------------------------|--------------|
|                                   | Peaks                                                 | Average peak width (bp) | Peaks                                                                 | Average peak width (bp) | Peaks                                               | % from total | Peaks                                                | % from total | Peaks                                                | % from total |
| H3K4me1                           | 14,738                                                | 6,751                   | 14,732                                                                | 6,752                   | 2,087                                               | 14%          | 2,230                                                | 15%          | 2,320                                                | 16%          |
| H3K27ac                           | 16,240                                                | 6,981                   | 16,230                                                                | 6,976                   | 2,409                                               | 15%          | 2,504                                                | 15%          | 2,568                                                | 16%          |
| p300                              | 1,333                                                 | 404                     | 1,331                                                                 | 402                     | 84                                                  | 6%           | 108                                                  | 8%           | 115                                                  | 9%           |
| Overlapping peaks for all 3 marks | 484                                                   | 417                     | 469                                                                   | 401                     | 28                                                  | 6%           | 37                                                   | 8%           | 35                                                   | 7%           |

**Mouse liver**

| Antibody                          | Total ChIP-seq peaks that overlap coding exons |                         | Total ChIP-seq peaks that overlap coding exons after LiftOver to hg18 |                         | Coding exon ChIP-seq peaks overlapping SCE9 windows |              | Coding exon ChIP-seq peaks overlapping SCE15 windows |              | Coding exon ChIP-seq peaks overlapping SCE30 windows |              |
|-----------------------------------|------------------------------------------------|-------------------------|-----------------------------------------------------------------------|-------------------------|-----------------------------------------------------|--------------|------------------------------------------------------|--------------|------------------------------------------------------|--------------|
|                                   | Peaks                                          | Average peak width (bp) | Peaks                                                                 | Average peak width (bp) | Peaks                                               | % from total | Peaks                                                | % from total | Peaks                                                | % from total |
| H3K4me1                           | 5,946                                          | 1,943                   | 1,099                                                                 | 1,561                   | 232                                                 | 21%          | 266                                                  | 24%          | 253                                                  | 23%          |
| H3K27ac                           | 9,241                                          | 2,699                   | 1,219                                                                 | 2,164                   | 250                                                 | 21%          | 268                                                  | 22%          | 275                                                  | 23%          |
| p300                              | 719                                            | 608                     | 310                                                                   | 631                     | 31                                                  | 10%          | 29                                                   | 9%           | 27                                                   | 9%           |
| Overlapping peaks for all 3 marks | 218                                            | 700                     | 81                                                                    | 728                     | 5                                                   | 6%           | 5                                                    | 6%           | 6                                                    | 7%           |
