# Supplementary material for: Systematic Dissection of Coding Exons at Single Nucleotide Resolution Supports an Additional Role in Cell-Specific Transcriptional Regulation
Source: PLoS Genet. 2014 Oct 23;10(10):e1004592. doi: 10.1371/journal.pgen.1004592 (PMC4207465; doi:10.1371/journal.pgen.1004592)
Supplement: Table S3 — eExon library characteristics. (XLSX) [file pgen.1004592.s007.xlsx]

## Sheet: MPRA Libaray 
Table S3. eExon library characteristics.
Library	Number of haplotypes	Number of tags	Percent of possible substitutions in at least one haplotype	Percent of possible pairs of positions in at least one haplotype	Per-base mutation rate per haplotype (mean ± s.d.)
SORL1 eExon 17	16483	16582	100 (1665 of 1665)	99.99 (307,395 of 307,470)	0.027 ± 0.008
PPRAG eExon 6	22320	22506	100 (1614 of 1614)	99.99 (288,869 of 288,906)	0.027 ± 0.009
TRAF3IP2 eExon 2	10029	10071	100 (1962 of 1962)	99.82 (426,282 of 427,062)	0.028 ± 0.008
For each library of eExon haplotypes, we list the number of distinct haplotypes, the number of tags with which those distinct haplotypes are associated in cis, the percentage of possible single-nucleotide substitutions that are present in at least one haplotype, the percentage of possible pairs of positions where both positions contain mutations together in at least one haplotype and the per-base…

## Sheet: R^2
Table S3: R-squared values of the linear regression model for each eExon library
SORL1 exon 17			PPARG exon 5			TRAF3IP2 exon 2
Position	R^2		Position	R^2		Position	R^2
1	6.52663e-06		1	0.000774614		1	0.000112093
2	1.29781e-07		2	0.000362682		2	0.000261056
3	0.000292028		3	0.00029541		3	0.000631979
4	0.000167396		4	0.00106098		4	8.98525e-05
5	5.27499e-05		5	1.633e-05		5	0.000253627
6	4.50923e-05		6	0.000561255		6	0.00028579
7	0.000151093		7	0.000752052		7	0.000159016
8	7.08952e-05		8	0.000962552		8	0.000343993
9	8.94815e-06		9	0.000255537		9	0.000337106
10	2.56597e-06		10	1.95549e-05		10	0.000873637
11	1.51505e-05		11	0.000233139		11	0.00015093
12	4.30571e-05		12	0.000386024		12	0.000456469
13	4.89271e-07		13	9.68755e-06		13	0.000124497
14	5.38131e-05		14	8.20933e-05		14	0.000111469
15	0.00011843		15	0.000275342		15	2.80275e-06
16	5.28968e-07		16	6.66102e-05		16	0.000126129
17	6.36612e-05		17	0.00021088		17	0.000219157
18	1.1601e-06		18	0.000497872		18	0.000185119
19	6.19744e-09		19	0.000141513		19	0.000645067
20	0.000252346		20	0.000242682		20	0.000379178
21	1.92025e-07		21	0.000311341		21	0.00150561
22	1.72304e-05		22	8.92119e-06		22	9.88651e-05
23	0.000103906		23	7.29372e-05		23	0.00023491
24	3.43946e-06		24	8.38773e-05		24	0.000172235
25	0.000278716		25	8.7367e-05		25	3.05369e-05
26	1.03063e-06		26	0.00013576		26	0.000191116
27	1.33499e-05		27	0.000131027		27	0.000320105
28	2.78093e-05		28	9.6809e-05		28	0.00020287
29	1.41334e-05		29	0.000106532		29	0.000215382
30	0.000320293		30	0.000700994		30	0.000352008
31	2.45093e-05		31	3.52023e-05		31	0.000213004
32	3.12152e-05		32	4.52156e-05		32	0.000162018
33	3.43485e-06		33	0.00011018		33	0.000164186
34	1.95387e-06		34	0.000143981		34	0.000289819
35	0.000153609		35	0.00026567		35	0.000138022
36	4.89077e-05		36	0.000159511		36	0.000587075
37	0.000125903		37	8.79166e-05		37	0.000562726
38	5.7125e-05		38	0.000134886		38	0.000261866
39	0.000127578		39	0.00017944		39	1.72058e-05
40	0.000149499		40	9.10391e-05		40	6.26054e-05
41	9.20001e-05		41	0.000134296		41	0.000294888
42	1.57128e-06		42	0.000265808		42	0.000421384
43	0.000105373		43	4.21699e-05		43	0.000116252
44	1.52117e-05		44	9.13117e-05		44	0.000298119
45	4.20024e-05		45	0.000564661		45	0.000350992
46	8.11206e-07		46	0.000417		46	0.000477424
47	1.11342e-05		47	0.000204406		47	0.000202799
48	5.33513e-05		48	0.000229389		48	0.000410604
49	3.8343e-05		49	0.000196824		49	0.000228023
50	4.38857e-05		50	0.0002729		50	0.00067181
51	1.06104e-05		51	4.88104e-05		51	0.00015483
52	3.81904e-05		52	0.000249024		52	0.000191458
53	6.20846e-05		53	0.000150945		53	0.000153459
54	2.06695e-09		54	0.00011201		54	0.000442393
55	4.95691e-05		55	0.000144071		55	0.000396646
56	1.55524e-05		56	7.44017e-05		56	7.26345e-05
57	2.38152e-07		57	0.00029045		57	0.000116979
58	0.000270694		58	0.000125358		58	0.0004066
59	1.8138e-05		59	0.000387072		59	0.000219686
60	7.12169e-05		60	0.000110294		60	0.000314857
61	4.78317e-05		61	7.69297e-05		61	0.000212662
62	7.39695e-06		62	8.42713e-05		62	0.000219493
63	0.000235552		63	0.000370255		63	0.000195636
64	4.9473e-06		64	0.000177785		64	5.40353e-05
65	1.23487e-05		65	5.31146e-05		65	0.000143036
66	3.71112e-06		66	0.00013044		66	0.000110343
67	0.000179724		67	0.000375951		67	0.00126411
68	0.000201543		68	7.53221e-06		68	0.000325241
69	1.41738e-05		69	0.000383242		69	0.000100212
70	5.97141e-06		70	0.000126191		70	0.000296413
71	5.78678e-05		71	0.000644927		71	0.000144287
72	3.12486e-05		72	7.07006e-05		72	0.000117186
73	3.22635e-05		73	0.000228252		73	0.000146739
74	2.01239e-05		74	0.000163808		74	0.000233799
75	1.65925e-05		75	1.87381e-05		75	0.000141948
76	2.27443e-06		76	0.000107508		76	0.000504337
77	9.35269e-05		77	0.000476982		77	9.01499e-05
78	5.24887e-07		78	8.38206e-06		78	0.00051714
79	9.42913e-06		79	7.41631e-05		79	0.000382481
80	1.39283e-05		80	0.000140477		80	0.0011226
81	8.93651e-06		81	0.000188029		81	0.000359045
82	4.83516e-07		82	0.000134739		82	4.82471e-05
83	0.000118792		83	9.89431e-05		83	1.08762e-05
84	0.000149674		84	5.2783e-05		84	0.000582343
85	5.47593e-05		85	8.53671e-05		85	0.000140814
86	1.11433e-05		86	0.000356422		86	5.18666e-06
87	3.54715e-05		87	0.000198265		87	0.000490902
88	4.15663e-05		88	2.11055e-05		88	0.000238922
89	0.000103977		89	0.000324203		89	0.000100815
90	2.65653e-05		90	0.000157706		90	3.84239e-05
91	0.000272137		91	9.6126e-05		91	8.82544e-05
92	2.67216e-07		92	0.000233026		92	8.93803e-05
93	0.000347336		93	0.000147497		93	0.000254312
94	1.44542e-07		94	3.62927e-05		94	0.00030888
95	0.000203819		95	0.000150029		95	0.000438832
96	0.000586079		96	3.29361e-05		96	0.000136003
97	2.17836e-06		97	0.000305659		97	0.00101135
98	9.50583e-06		98	0.000154507		98	0.000306238
99	4.08546e-07		99	8.34267e-05		99	0.000193507
100	0.00017771		100	0.000146599		100	9.27943e-05
101	1.35512e-05		101	9.44724e-05		101	8.64013e-05
102	1.716e-09		102	0.000182717		102	0.000383901
103	1.59076e-09		103	0.000190583		103	0.00042668
104	7.39279e-05		104	0.00017057		104	0.000166706
105	3.4427e-06		105	5.19711e-05		105	0.000542351
106	6.56986e-05		106	0.000196059		106	0.000762891
107	3.92609e-05		107	0.000163449		107	0.000722386
108	3.82409e-05		108	7.4298e-05		108	0.000613047
109	9.3799e-05		109	0.000130879		109	0.000186149
110	8.82091e-07		110	0.000235941		110	0.000318597
111	2.86889e-07		111	0.000173868		111	0.000231722
112	2.50261e-05		112	0.000458844		112	0.000313177
113	5.19024e-07		113	0.00051651		113	0.000564655
114	0.000253685		114	0.00013145		114	0.000746417
115	1.63546e-05		115	1.12356e-05		115	0.000248815
116	2.13757e-06		116	0.000366996		116	0.000803997
117	0.000108562		117	0.000166524		117	0.000163796
118	0.000142515		118	0.000182297		118	7.08582e-05
119	1.3946e-05		119	0.000159595		119	0.000252125
120	7.4974e-05		120	7.04803e-05		120	2.85043e-05
121	0.000323678		121	9.87405e-05		121	0.000274628
122	8.74621e-06		122	0.000272858		122	0.000137863
123	0.000158866		123	0.0001144		123	8.7029e-05
124	0.000195858		124	5.83e-05		124	0.000899812
125	0.000102098		125	2.49823e-05		125	0.000230889
126	0.000223121		126	8.33385e-05		126	0.000242727
127	4.26364e-06		127	0.000115747		127	0.000105887
128	3.21607e-06		128	0.000524831		128	0.000186967
129	0.000162516		129	0.000348126		129	0.000257808
130	1.78226e-06		130	0.00013256		130	0.000328204
131	2.99736e-08		131	0.000119934		131	9.38591e-05
132	3.21428e-05		132	3.56801e-05		132	0.000592841
133	1.02267e-05		133	0.000350368		133	0.000116658
134	2.63547e-05		134	4.80904e-05		134	0.000649401
135	7.84692e-07		135	0.00018985		135	0.000269169
136	2.18177e-06		136	0.000414708		136	0.000589236
137	1.31364e-05		137	7.588e-05		137	0.000368645
138	1.34525e-05		138	0.000227892		138	4.95432e-05
139	7.05412e-05		139	0.000111657		139	0.000206358
140	1.36126e-06		140	0.000727563		140	0.000197833
141	8.0624e-07		141	1.54481e-05		141	8.47267e-05
142	1.14605e-05		142	0.000252316		142	0.000385924
143	6.99316e-05		143	0.000202792		143	2.44332e-05
144	5.14139e-05		144	8.23396e-05		144	0.000295707
145	1.82575e-05		145	8.74782e-05		145	0.000450444
146	0.000126787		146	0.00020522		146	0.000400853
147	8.54446e-07		147	0.000161122		147	0.000207009
148	0.000466532		148	3.73534e-05		148	0.000248807
149	4.00329e-05		149	6.54266e-05		149	0.000387498
150	0.000177728		150	5.04945e-05		150	0.000111515
151	0.000164692		151	2.19901e-05		151	0.000264625
152	2.25717e-05		152	0.000129797		152	0.000740521
153	1.10985e-06		153	0.000281024		153	0.000125619
154	9.56015e-05		154	0.000103137		154	0.000819825
155	5.73346e-05		155	8.15961e-05		155	2.37469e-05
156	1.12322e-06		156	0.000241818		156	0.000494267
157	1.65843e-05		157	0.000737414		157	6.40025e-05
158	1.34858e-06		158	0.000946903		158	0.000151635
159	0.00014155		159	0.000794995		159	0.000757334
160	5.07892e-05		160	0.000453875		160	0.000119212
161	7.61065e-05		161	0.00124483		161	0.000159124
162	0.000283719		162	0.000468366		162	0.000240633
163	0.00014857		163	0.00014723		163	0.000222274
164	4.30243e-05		164	0.000808891		164	0.000153095
165	0.00019607		165	0.000256966		165	0.000145494
166	6.90217e-07		166	0.000109954		166	0.000853589
167	0.000177258		167	3.85281e-05		167	0.000154634
168	0.00040789		168	0.000136903		168	0.000553081
169	8.23628e-05		169	0.000180394		169	0.000164478
170	1.05952e-06		170	6.44672e-05		170	7.36596e-05
171	1.92143e-05		171	0.000160839		171	0.000158719
172	1.11747e-05		172	8.25109e-05		172	5.98409e-05
173	5.00321e-05		173	0.000155393		173	1.23507e-05
174	6.98653e-06		174	5.48429e-05		174	0.000480164
175	0.000212128		175	0.000161327		175	0.000259622
176	7.21659e-05		176	0.00048518		176	4.43429e-05
177	2.56892e-05		177	0.000500099		177	6.59474e-05
178	3.04846e-05		178	0.000103975		178	0.000221203
179	0.000134193		179	0.000212785		179	0.000300229
180	0.000417763		180	0.000561988		180	0.000282085
181	0.00019648		181	3.21574e-05		181	0.000284123
182	1.18862e-05		182	0.000381723		182	7.78846e-05
183	0.000349117		183	3.55055e-05		183	0.00045835
184	8.88521e-05		184	4.20003e-05		184	0.000221065
185	0.000620407		185	0.000294166		185	0.000161743
186	1.31194e-05		186	0.000491848		186	0.000255593
187	0.000189844		187	0.000116735		187	7.06188e-05
188	0.000140988		188	0.000393798		188	0.000117329
189	0.000316027		189	0.000524183		189	2.78986e-05
190	5.34139e-05		190	0.000226189		190	0.000490819
191	2.41835e-05		191	9.52557e-06		191	0.000456977
192	0.000103326		192	0.000350726		192	0.000110375
193	1.89738e-07		193	0.000226866		193	0.000766162
194	1.94117e-05		194	0.000153313		194	0.000655784
195	2.79522e-07		195	0.000231186		195	1.73694e-05
196	1.39863e-05		196	0.000396351		196	0.000320324
197	0.000943879		197	0.000666636		197	0.00036186
198	0.000288771		198	0.000494475		198	0.000333236
199	0.000545931		199	4.36282e-05		199	0.000442134
200	0.000108981		200	0.000111918		200	4.2795e-05
201	2.96888e-05		201	0.000110045		201	0.000466501
202	7.88307e-05		202	0.000356097		202	0.000164171
203	0.000408062		203	7.1904e-05		203	8.29958e-06
204	8.90663e-06		204	0.00048974		204	0.000357431
205	2.38161e-05		205	0.000289708		205	5.49322e-05
206	0.000187359		206	0.000230406		206	0.000592739
207	7.01221e-05		207	0.000258088		207	0.000244402
208	9.36156e-06		208	0.000321706		208	0.000203158
209	0.000208047		209	2.88922e-06		209	0.000354055
210	1.09517e-06		210	0.000166179		210	1.06243e-05
211	9.86239e-05		211	5.77075e-05		211	0.000172843
212	4.91824e-05		212	0.000199132		212	7.14473e-05
213	0.000162262		213	0.000554159		213	0.000463107
214	0.000228599		214	0.000601111		214	0.000137161
215	7.84044e-05		215	0.000310027		215	0.000152038
216	8.70983e-05		216	9.68306e-05		216	3.4178e-05
217	3.12486e-05		217	0.000680244		217	0.000134853
218	4.28228e-06		218	0.000150333		218	5.09092e-05
219	1.32463e-05		219	0.00540879		219	2.36465e-05
220	0.000301696		220	0.000299881		220	8.93602e-05
221	0.00013712		221	0.000598166		221	0.000538751
222	0.000135811		222	0.00025869		222	0.000363588
223	0.000180932		223	0.000595106		223	0.000101654
224	3.50713e-05		224	0.0014978		224	0.00027372
225	5.59859e-05		225	0.000690467		225	0.000185229
226	8.75423e-05		226	0.00034207		226	7.59465e-05
227	0.000123325		227	0.000144723		227	0.000376934
228	1.08469e-06		228	0.000609631		228	0.000146341
229	2.00443e-06		229	0.000493152		229	0.00045296
230	7.12061e-05		230	0.000928999		230	0.000133629
231	0.000128261		231	0.00149896		231	8.3194e-05
232	2.65439e-05		232	0.00197442		232	0.000195453
233	4.65352e-05		233	0.00178277		233	2.18866e-05
234	0.000239382		234	0.000372354		234	0.00020137
235	6.83865e-05		235	0.0019577		235	0.000221134
236	0.000196614		236	0.00117623		236	0.000129628
237	5.73928e-06		237	0.00240622		237	0.000194794
238	0.000251233		238	0.000521068		238	0.00100369
239	9.6119e-06		239	5.43236e-05		239	0.000190635
240	0.000222245		240	2.21453e-05		240	0.000244087
241	3.33295e-06		241	0.000346686		241	0.000220923
242	0.000114605		242	0.000620952		242	0.000181214
243	7.96192e-05		243	0.00069654		243	0.000194793
244	6.14307e-06		244	0.000601568		244	0.00129964
245	9.969e-05		245	0.000549667		245	3.57588e-05
246	0.000152908		246	0.000180598		246	1.79145e-05
247	6.61679e-05		247	0.000310104		247	0.000969512
248	6.80803e-05		248	0.000603779		248	1.14772e-05
249	2.18244e-05		249	0.00141951		249	0.000381338
250	4.67162e-05		250	1.76894e-05		250	0.00119785
251	2.7806e-05		251	0.000173851		251	0.000343824
252	0.000194635		252	0.000336552		252	0.000311971
253	0.000932551		253	0.000730742		253	0.000486017
254	0.000285484		254	0.000881931		254	0.000113582
255	0.000108985		255	0.000451024		255	4.68757e-05
256	0.00178394		256	0.000511452		256	0.000654188
257	0.000745507		257	0.000604256		257	0.000539616
258	0.000769069		258	0.00120093		258	0.000495704
259	0.00239794		259	0.000540192		259	0.000223549
260	0.00272629		260	0.000403078		260	0.000296793
261	0.00073009		261	7.35013e-05		261	0.000521646
262	0.0033518		262	3.17506e-05		262	0.000299506
263	0.00443123		263	0.00262968		263	0.000379366
264	0.00357535		264	0.000112363		264	0.000869878
265	0.00209582		265	0.000288522		265	0.000100157
266	0.00209329		266	0.000115177		266	0.000238197
267	0.00228521		267	0.000375058		267	0.00479067
268	0.00030728		268	0.000165837		268	0.000284229
269	0.00143029		269	0.00108716		269	2.37701e-05
270	7.21084e-05		270	8.64493e-05		270	0.000160079
271	3.64654e-05		271	0.000148365		271	0.000927574
272	0.00194695		272	1.20465e-05		272	0.000207343
273	0.000260495		273	1.29991e-05		273	0.000165031
274	0.00108175		274	0.000225498		274	7.37848e-05
275	1.80618e-05		275	0.000240469		275	0.000111393
276	0.000555073		276	0.000204544		276	0.000583552
277	0.000318222		277	0.000234516		277	0.000727034
278	8.2831e-05		278	0.00017836		278	0.000835728
279	6.99671e-05		279	0.000367435		279	0.00140186
280	1.01067e-05		280	6.26832e-05		280	1.71898e-05
281	0.000792425		281	5.23162e-06		281	0.000170312
282	0.00125506		282	0.000194268		282	0.000129844
283	0.00115007		283	0.00024873		283	0.00191318
284	0.000933097		284	0.000530096		284	0.00076757
285	0.00134347		285	0.00068399		285	0.000388827
286	0.000813786		286	8.07874e-05		286	0.000492457
287	0.000696982		287	1.35804e-05		287	0.000176806
288	0.00034401		288	0.000351921		288	0.000199948
289	0.000850665		289	0.000493932		289	0.000527872
290	0.000183401		290	4.92845e-05		290	0.000542739
291	0.000422799		291	5.98058e-05		291	0.000131117
292	0.000909247		292	0.000867454		292	0.000577564
293	0.000151519		293	3.03697e-05		293	0.00124739
294	0.00232753		294	9.67335e-05		294	0.00054581
295	0.000312172		295	8.09777e-05		295	0.000188931
296	0.00116365		296	0.000376068		296	0.00064064
297	0.000201748		297	0.000106167		297	0.000104938
298	1.92959e-05		298	6.03225e-05		298	0.000360023
299	0.000119725		299	5.26317e-05		299	0.000262812
300	5.0523e-05		300	0.000178365		300	0.000433212
301	0.000526914		301	0.000147205		301	0.000736703
302	0.000525654		302	6.06261e-05		302	0.00024373
303	0.000281759		303	0.000278141		303	0.000737056
304	0.000876672		304	0.000725977		304	0.000188765
305	0.00067028		305	0.000245094		305	0.000315974
306	6.63196e-05		306	0.000433669		306	0.000153876
307	0.00073926		307	0.00187012		307	0.000633721
308	0.000973291		308	0.000166675		308	0.000154592
309	7.21719e-07		309	0.00192831		309	0.000784761
310	6.76297e-05		310	0.00252386		310	0.000216926
311	5.30327e-06		311	0.000451984		311	0.00024135
312	1.13017e-06		312	0.000112745		312	0.000948679
313	1.99639e-05		313	0.000165734		313	7.87461e-05
314	9.22125e-05		314	0.000529366		314	0.00192427
315	0.000779241		315	0.000270958		315	0.000633936
316	1.69736e-05		316	0.000419982		316	0.000217997
317	0.00024911		317	0.000454605		317	7.77817e-05
318	0.000386261		318	0.000161403		318	0.000534129
319	1.34858e-06		319	0.000400313		319	0.000225195
320	0.000444005		320	0.000212962		320	0.000511426
321	0.00131784		321	0.000811176		321	0.000126255
322	0.00484612		322	8.21494e-05		322	0.00135092
323	0.00420722		323	0.000224946		323	6.64237e-05
324	0.00458502		324	0.000102219		324	0.000430221
325	3.34282e-05		325	0.000351001		325	0.00078306
326	0.00978296		326	0.000164895		326	0.000195601
327	0.00560384		327	0.000628905		327	0.00122315
328	0.00855264		328	0.00141619		328	0.000144678
329	0.000112544		329	0.00133871		329	0.000657862
330	0.000589626		330	0.00221648		330	0.00129969
331	1.48482e-05		331	0.00213987		331	0.000903868
332	0.000186976		332	0.00219285		332	0.00149445
333	0.000418839		333	0.0031589		333	0.00287332
334	9.93763e-06		334	0.00104944		334	0.00276247
335	0.00015985		335	0.000309334		335	0.00131717
336	2.44609e-05		336	0.00085728		336	0.00386691
337	2.25189e-05		337	0.000104807		337	0.000748695
338	0.000195235		338	0.000141245		338	0.00207257
339	0.000902066		339	0.000574113		339	0.00460995
340	3.432e-06		340	0.000769399		340	0.00483133
341	9.4284e-05		341	0.00121571		341	0.001032
342	8.01832e-05		342	4.25279e-05		342	0.000253714
343	0.000167706		343	0.000686467		343	0.00111348
344	8.07003e-05		344	0.0012692		344	0.00562004
345	0.000205077		345	0.000403761		345	0.00285762
346	5.84536e-07		346	0.00118678		346	0.00134212
347	5.5817e-05		347	0.00102328		347	0.00416378
348	6.59295e-05		348	0.00216073		348	0.00367037
349	0.000931613		349	0.00174427		349	0.00157531
350	2.48255e-05		350	0.00180045		350	0.000706566
351	0.000463435		351	0.0015951		351	0.00015946
352	0.000371547		352	0.00188986		352	0.000162215
353	1.73195e-05		353	0.000168285		353	0.00180593
354	0.000250145		354	0.000552566		354	0.00320693
355	9.44915e-05		355	0.00168822		355	0.00486108
356	1.48526e-06		356	0.00151063		356	0.00729319
357	0.0030326		357	0.00191197		357	0.0058803
358	0.000166952		358	0.000368858		358	0.000217841
359	6.57821e-05		359	0.000889671		359	0.000902476
360	0.000340555		360	0.000589886		360	0.00285006
361	0.000866267		361	0.000319832		361	0.00353344
362	2.20054e-05		362	0.000177193		362	0.0015746
363	0.00194393		363	0.000229965		363	0.0055505
364	0.000666543		364	0.00108934		364	0.00167869
365	0.00022912		365	5.19444e-05		365	0.000501539
366	0.000421322		366	2.07438e-05		366	0.00269086
367	0.000234328		367	0.00032931		367	0.00574022
368	0.000101852		368	0.000414614		368	0.00462847
369	0.000100324		369	0.000436762		369	0.00199283
370	4.2689e-05		370	0.000452565		370	0.00380976
371	2.48956e-05		371	0.000237841		371	0.00402963
372	1.86231e-05		372	0.00040969		372	0.00477137
373	2.13478e-05		373	0.00400474		373	0.0284479
374	8.85187e-06		374	0.000623175		374	0.00221255
375	0.000617713		375	4.04269e-05		375	0.00483378
376	0.000178485		376	0.000505511		376	0.000783044
377	0.000400342		377	0.000418718		377	0.003434
378	0.000559528		378	0.000334399		378	0.000719645
379	0.000170141		379	0.000134551		379	0.000234648
380	0.00067086		380	0.000257558		380	0.00295038
381	3.00688e-06		381	0.000191897		381	0.00488235
382	4.17446e-05		382	0.000258704		382	0.00313362
383	2.63027e-05		383	0.000411374		383	0.00410397
384	1.24213e-05		384	0.00651754		384	0.00105346
385	0.000122392		385	0.00433466		385	0.00799917
386	0.000141231		386	0.00432597		386	0.0050668
387	0.000368923		387	0.000503117		387	0.0010537
388	8.04307e-05		388	0.00424219		388	0.00155268
389	3.41557e-05		389	0.00319521		389	0.000708666
390	0.000842195		390	0.00369763		390	0.000387627
391	0.000251386		391	0.00105535		391	4.96726e-05
392	0.000215484		392	2.98768e-05		392	0.000360452
393	0.00520315		393	0.00017749		393	0.000251604
394	9.64228e-05		394	2.63981e-05		394	0.000952642
395	0.000186062		395	0.000847764		395	0.00132012
396	0.000431661		396	0.000550835		396	0.0019499
397	4.35359e-06		397	0.00068169		397	0.000559239
398	0.000596103		398	0.000579218		398	0.00030432
399	0.0017552		399	0.0207003		399	0.00073505
400	0.000396721		400	0.000169464		400	0.00124621
401	0.000234567		401	0.00091225		401	0.0013111
402	0.000107467		402	0.000605415		402	0.00395037
403	0.000768089		403	0.00039316		403	0.00694909
404	0.000235257		404	0.000158174		404	0.00369475
405	0.0002342		405	0.000635809		405	0.00452
406	5.5942e-06		406	0.000710242		406	0.0100626
407	7.61106e-06		407	0.00200469		407	0.00857276
408	7.93641e-05		408	0.00228945		408	0.00881594
409	4.05052e-05		409	0.00163463		409	0.00677672
410	1.4401e-05		410	7.01913e-05		410	0.000207121
411	0.000148924		411	0.000298144		411	0.000450623
412	0.000172772		412	5.80341e-05		412	0.00143513
413	0.000746783		413	7.34633e-05		413	0.0014563
414	2.04379e-07		414	0.00168553		414	0.000812349
415	2.54683e-06		415	0.000246106		415	0.000919258
416	0.000127326		416	0.000952136		416	0.000670538
417	3.6206e-05		417	0.00109947		417	0.00149649
418	1.60457e-05		418	0.00220693		418	0.000353407
419	1.07093e-08		419	0.000735927		419	0.00064688
420	0.000112179		420	0.000255362		420	0.000766274
421	5.35523e-07		421	0.00029234		421	0.00724905
422	0.000195816		422	0.00016594		422	0.00092734
423	0.000475923		423	0.00087864		423	6.72696e-05
424	2.42558e-05		424	0.000324392		424	0.00172026
425	0.000102098		425	0.000562095		425	0.000775144
426	5.18366e-05		426	0.000326567		426	0.000179058
427	0.00035284		427	0.00288347		427	0.00103958
428	0.000204115		428	0.000545362		428	0.00112846
429	6.11347e-06		429	0.00032846		429	0.000316293
430	0.000431655		430	0.000453529		430	0.000527224
431	0.00188751		431	0.00102764		431	0.000414161
432	6.06438e-07		432	0.000400178		432	6.35157e-05
433	0.00123768		433	9.40666e-05		433	0.000137614
434	0.000129474		434	0.00021506		434	0.00031623
435	0.00328726		435	0.000321915		435	0.000254223
436	0.000636293		436	7.94616e-05		436	0.000509565
437	0.000595544		437	0.00100818		437	0.00111124
438	0.000646116		438	0.000596806		438	0.000291113
439	0.000228639		439	0.000287269		439	7.99487e-05
440	0.000308738		440	0.00126586		440	0.000568283
441	9.92277e-06		441	0.00197986		441	0.000291757
442	0.000419151		442	0.00152701		442	0.000761583
443	0.000397998		443	0.00120962		443	0.000507163
444	0.00014307		444	0.00281354		444	0.000554984
445	3.39915e-06		445	0.00111165		445	0.00058455
446	3.3907e-05		446	0.00124219		446	6.20164e-05
447	0.000132051		447	0.0062631		447	0.000343904
448	0.000362862		448	0.000146088		448	0.000715876
449	8.98447e-06		449	0.000325365		449	0.00107416
450	0.000302708		450	0.000250778		450	5.53553e-05
451	0.000458394		451	0.00117911		451	0.000274764
452	0.000122088		452	0.00188238		452	0.000376744
453	9.78538e-07		453	0.000687996		453	0.000709448
454	1.83707e-06		454	0.000856055		454	0.000359027
455	4.67033e-05		455	0.00232708		455	0.000778405
456	0.000744206		456	0.00107345		456	0.00156582
457	5.01404e-06		457	0.000332915		457	0.000260701
458	7.05781e-05		458	0.000939437		458	0.000411254
459	2.17749e-06		459	0.000478506		459	0.00181558
460	0.000221137		460	0.000437922		460	7.42542e-05
461	0.000166986		461	0.000511576		461	0.00035216
462	0.000348115		462	0.000529757		462	0.000167523
463	4.27529e-05		463	0.000769719		463	0.000381203
464	0.000191399		464	0.000215538		464	5.13205e-05
465	3.90113e-05		465	4.90152e-05		465	0.000287357
466	2.93029e-06		466	0.000173326		466	0.000964748
467	0.000273997		467	0.000165336		467	0.000156539
468	1.09693e-06		468	0.000532977		468	0.000114051
469	0.000855675		469	4.75434e-05		469	0.00107709
470	4.35872e-05		470	0.00050786		470	0.00011063
471	0.000253577		471	6.36086e-06		471	0.000862348
472	4.79155e-06		472	0.00030449		472	0.00154642
473	0.000265375		473	0.000332063		473	0.000809923
474	1.61287e-06		474	1.66334e-06		474	0.00101255
475	0.000263139		475	0.000459701		475	0.00188846
476	6.772e-08		476	0.000247004		476	0.00265512
477	1.91734e-05		477	0.000936583		477	0.000746838
478	0.000365943		478	0.00018626		478	0.00045253
479	2.77469e-05		479	0.000212541		479	0.00110592
480	1.21818e-08		480	0.000198575		480	0.00025545
481	4.83814e-06		481	0.00160108		481	7.04132e-05
482	5.81404e-06		482	0.000494846		482	0.00163017
483	0.000504329		483	0.00084021		483	0.000391304
484	1.98519e-05		484	0.000239381		484	0.000626467
485	2.14627e-05		485	5.13999e-05		485	0.00181694
486	3.19679e-06		486	0.000289085		486	0.000443867
487	1.6795e-05		487	0.00038628		487	0.00100466
488	3.43682e-05		488	7.50392e-05		488	9.79369e-05
489	9.16119e-05		489	0.00027676		489	0.000228179
490	2.07685e-05		490	0.000286055		490	0.000627553
491	0.000265051		491	0.000313703		491	0.000571824
492	0.000103093		492	0.000179746		492	0.000998978
493	8.31866e-05		493	0.000320683		493	0.000373845
494	0.000313643		494	0.000280736		494	0.000248627
495	3.64307e-05		495	3.22545e-05		495	4.15389e-05
496	7.60737e-05		496	0.000265388		496	0.000628608
497	0.00011336		497	0.000255131		497	0.000641127
498	4.13436e-05		498	0.00016385		498	0.000127912
499	2.03713e-06		499	0.000152575		499	6.88402e-05
500	8.012e-05		500	3.04249e-05		500	0.000548085
501	7.19018e-05		501	0.000203083		501	0.000163035
502	9.24103e-06		502	0.000448957		502	0.000499367
503	4.46691e-05		503	0.000179428		503	0.000571353
504	6.55521e-05		504	0.000200962		504	0.000553862
505	5.49528e-05		505	0.000376752		505	0.000353188
506	6.38526e-05		506	2.01862e-05		506	0.000335643
507	4.92386e-05		507	8.03616e-05		507	0.000310042
508	5.96407e-05		508	0.00025042		508	0.000349036
509	0.000152527		509	0.00117303		509	0.000610057
510	0.000857977		510	0.000272133		510	0.00146466
511	0.00018831		511	0.00130432		511	4.95623e-05
512	1.43517e-09		512	0.000402663		512	0.000161934
513	1.38452e-06		513	0.000134092		513	0.000392263
514	7.5747e-05		514	0.000563439		514	0.00011555
515	5.93596e-06		515	0.000104493		515	0.000219858
516	8.55548e-06		516	9.02623e-05		516	0.000183443
517	5.58885e-05		517	0.00131477		517	2.51459e-05
518	7.09401e-05		518	9.15256e-05		518	0.000153914
519	2.48354e-05		519	5.94055e-05		519	0.000266049
520	3.35637e-06		520	0.000142403		520	0.000364394
521	7.75741e-05		521	0.000160686		521	0.000362761
522	3.52881e-05		522	0.000201394		522	7.07457e-05
523	3.29708e-05		523	0.000441005		523	0.000444739
524	1.64549e-05		524	0.000263064		524	3.52622e-05
525	5.40623e-06		525	0.000315949		525	0.000467834
526	0.000147178		526	0.000331257		526	3.37696e-05
527	0.000296749		527	0.000269285		527	0.00051075
528	0.000288262		528	3.86537e-07		528	0.000144954
529	0.000239515		529	0.000654748		529	0.00055783
530	1.45568e-06		530	0.000389405		530	0.000241296
531	0.000130416		531	0.00251444		531	0.000439956
532	1.52124e-05		532	0.000934656		532	0.000318158
533	5.44155e-05		533	0.000506352		533	5.99051e-05
534	2.8626e-05		534	0.00104524		534	5.01832e-05
535	0.000719647		535	0.00178124		535	0.00191621
536	0.000144389		536	0.012989		536	0.000500328
537	0.000139012		537	0.000128735		537	0.000192443
538	0.000255613		538	0.00075294		538	0.000208959
539	2.23814e-05					539	0.000149062
540	1.33776e-06					540	0.000295636
541	1.87644e-05					541	0.000504882
542	6.61861e-05					542	0.000236285
543	3.64036e-06					543	7.75941e-05
544	4.10102e-05					544	7.84098e-05
545	0.000289794					545	0.00022715
546	0.000252194					546	0.000989472
547	1.69485e-06					547	0.000436513
548	5.7055e-06					548	0.000458091
549	0.000170435					549	0.000528341
550	0.000245269					550	0.00103964
551	7.17445e-05					551	4.43249e-05
552	5.47219e-05					552	0.000116861
553	1.1729e-06					553	5.26325e-05
554	5.7013e-05					554	0.00019718
555	0.000188886					555	0.000806702
						556	0.000294623
						557	0.000514386
						558	0.000445489
						559	0.00140033
						560	5.67944e-05
						561	7.09626e-05
						562	0.000151193
						563	0.000175451
						564	0.000108461
						565	0.000353792
						566	0.000621113
						567	0.000236615
						568	0.000623788
						569	8.30707e-05
						570	0.00092263
						571	0.000343602
						572	0.000161436
						573	7.18368e-05
						574	0.00060012
						575	0.000999293
						576	0.000644733
						577	0.000562821
						578	0.000660757
						579	0.000317645
						580	4.63034e-05
						581	0.000421029
						582	0.00026816
						583	8.42119e-05
						584	0.000337498
						585	0.000219198
						586	0.000359469
						587	0.000797236
						588	7.41551e-05
						589	0.000780502
						590	6.17851e-05
						591	0.000271226
						592	5.30481e-05
						593	0.000179163
						594	0.000150828
						595	0.000942944
						596	0.000181319
						597	0.00236861
						598	0.000237013
						599	0.00032418
						600	0.00071293
						601	0.000283347
						602	0.000814226
						603	0.000773742
						604	0.00042847
						605	0.000209507
						606	0.000116327
						607	0.000472178
						608	0.000191669
						609	0.000376685
						610	0.000559987
						611	0.000510503
						612	0.000570114
						613	0.000241262
						614	0.000388078
						615	0.000223399
						616	0.0007593
						617	0.000277285
						618	0.000310109
						619	3.13248e-05
						620	0.000905992
						621	0.000340601
						622	0.000351073
						623	0.000722298
						624	0.00106231
						625	0.000213826
						626	0.000822433
						627	0.000223993
						628	0.000237378
						629	0.000271186
						630	0.000298803
						631	0.000111833
						632	7.14428e-05
						633	0.000369213
						634	0.000581581
						635	0.00214251
						636	6.54248e-05
						637	0.00124067
						638	0.000168852
						639	0.000369692
						640	0.00029245
						641	1.60008e-05
						642	0.00084432
						643	0.000624606
						644	0.000421854
						645	0.00126121
						646	0.000944054
						647	0.000907212
						648	0.00140421
						649	0.00188735
						650	0.000356834
						651	0.000877693
						652	0.000360806
						653	0.000552548
						654	0.000960658
